# Supplementary material
Source: Research Square preprint supplement (doi:10.21203/rs.3.rs-6289246/v1)
Supplement: Supplementary file 1 [file 24142e7206338661f6c6f48d.xlsx]

## Sheet: Fig 1
		excellent	good	satisfactory	adequate	poor	bad	Total
											good	adequate	poor
	Physician	96	397	405	135	51	6	1090		Physicians	493	540	57	1090
	Veterinarian	39	176	130	34	13	1	393		Veterinarian	215	164	14	393
	Nursing staff	12	90	140	76	45	7	370		Nursing staff	102	216	52	370
	Medical assistant	2	23	33	22	6	0	86		Medical assistant	25	55	6	86

## Sheet: Fig 2 Top
			beruf_2	Physicians				Veterinarians				Nursing	Medical Assistant	Other
				Self	Delegation	Self or Delegation	Total	Self	Delegation	Self or Delegation	Total
			Mensch	0.189633	0.224691	0.203032	0.204371	0.0709877	0.05	0.0673401	0.0655738	0.184777	0.312569	0.168708
				0.0079683	0.0088278	0.0071991	0.0045943
				339	270	366	975
													beruf_2	mean	N
													Mensch	0.205371	1095
													Tier	0.0676819	394
													Pflege	0.184777	376
													Fachangeste	0.312569	86
													sonstige	0.168708	140
													Total	0.177678	2091

## Sheet: Fig 2 left
						Physicians			Veterinarians
					beruf_2	Self	Delegation	Self or Delegation	Self	Delegation	Self or Delegation	Total		Human	mean	se(mean)	p5	p25	p50	p75	p95
					mean	36.62	36.67	33.19	64.42	64.1	67.6	9.07816		self	36.6264	2.59097	5.1	10.2	25.5	45.9	102
					se(mean)	2.6	4.4	2.5	6.8	7.4	5.5	0.240738		delegation	36.6762	4.39349	5.1	10.2	25.5	45.9	76.5
					p5	1	1	1	1	0		1		self or delegation	33.19	2.54562	5.1	10.2	25.5	35.7	76.5
					p25	2	5	5	5	2		3		Veterinarian
					p50	5	10	6	10	5		5		self	67.422	6.75395	5.1	25.5	51	102	229.5
					p75	9	15	14	20	10		10		delegation	64.0977	7.44028	5.1	25.5	51	76.5	153
					p95	15	30	30	40	30		30		self or delegation	67.6014	5.5223	5.1	25.5	51	102	153
					N	1088	393	367	86	139		2073
					mean	36.62	36.67	33.19	64.42	64.1	67.6	46.2986
		45.9	0		p5	5.1	5.1	5.1	5.1	5.1	5.1	5.1
		-15.3	0		p25	5.1	5.1	5.1	20.4	20.4	20.4	15.3
		0	0		p50	25.5	25.5	25.5	51	51	51	25.5
		30.6	0		p75	10.2	35.7	25.5	76.5	51	76.5	51
			0		p95	56.1	30.6	40.8	127.5	76.5	51	153
							102	102	280.5	204
						mean = value			2.59097
						p50 = target	strich		4.39349
						p5=poor			2.54562
									6.75395
									7.44028
									5.5223

## Sheet: Fig 2 right
			beruf_2	Physicians	Veterinarians	Nursing	Medical Assistant	Other		Total
			mean	6.15901	13.8285	11.2866	16.2093	8.2536		9.07816
			se(mean)	0.215433	0.718307	0.690136	1.46767	0.737532		0.240738
			p5	1	1	1	1	0		1
			p25	2	5	5	5	2		3
			p50	5	10	6	10	5		5
			p75	9	15	14	20	10		10
			p95	15	30	30	40	30		30
			N	1088	393	367	86	139		2073
			mean	31.4109	70.5254	57.5616	82.6674	42.0933	0	46.2986
-5.1	0		p5	5.1	5.1	5.1	5.1	0	0	5.1
10.2	0		p25	5.1	20.4	20.4	20.4	10.2	0	15.3
0	0		p50	25.5	51	30.6	51	25.5	0	25.5
5.1	0		p75	35.7	51	45.9	76.5	40.8	0	51
	0		p95	30.6	76.5	81.6	102	102	0	153
					204	183.6	255	178.5
				mean = value			1.09871
				p50 = target	strich		3.66337
				p5=poor			3.51969
							7.48514
							3.76141

## Sheet: Fig 3 top
			Humanmediziner	info_e~l	info_e~r	i~gefa~g	info_~rt	info_~nt	info_e~s	in~ldiag	info~gen	inf~sten	info_e~e	N
				Sampling Modality	Default analytics	Optimal container	Optimal transport	Time of analysis	Time to result	Special diagnostics	Minimum quantity	Costs	None
			self	0.548951	0.461539	0.531469	0.412587	0.143357	0.0944056	0.206294	0.129371	0.136364	0.178322	286
			delegation	0.578475	0.529148	0.632287	0.488789	0.174888	0.0807175	0.215247	0.139014	0.206278	0.147982	223
			self or delegation	0.518293	0.432927	0.542683	0.439024	0.152439	0.0579268	0.219512	0.146342	0.121951	0.170732	328
			Total	0.544803	0.468339	0.562724	0.44325	0.155317	0.0764636	0.213859	0.13859	0.149343	0.167264	837
			Vets	erststrahl	erreger	diag	transport	labunt	ergebnis	spezialdiag	mindestmengen	kosten	keine
			delegation_anforderung	info_e~l	info_e~r	i~gefa~g	info_~rt	info_~nt	info_e~s	in~ldiag	info~gen	inf~sten	info_e~e	N
				Sampling Modality	Default analytics	Optimal container	Optimal transport	Time of analysis	Time to result	Special diagnostics	Minimum quantity	Costs	None
			self	0.711538	0.644231	0.721154	0.817308	0.182692	0.451923	0.317308	0.759615	0.894231	0.0480769	104
			delegation	0.72	0.68	0.72	0.68	0.22	0.34	0.32	0.62	0.76	0.04	50
			self or delegation	0.691429	0.634286	0.714286	0.725714	0.177143	0.308571	0.331429	0.588571	0.748571	0.04	175
			Total	0.702128	0.644377	0.717325	0.74772	0.18541	0.358663	0.325228	0.647416	0.796353	0.0425532	329

## Sheet: Fig 3 bottom
		Menschenärzte	Sampling Modality	Special diagnostics	Optimal transport	Time of analysis	Symptom-based request	Default analytics	Optimal container	Pathogen-based request	Time to result	Minimum quantity	all	none
		delegation_anforderung	info_h~l	~es_diag	info_h~t	info_h~n	i~mbezug	inf~tine	info_h~s	i~rbezug	info_h~r	info_~ge	info_~le	~f_keine	N
			Sampling Modality	Special diagnostics	Optimal transport	Time of analysis	Symptom-based request	Default analytics	Optimal container	Pathogen-based request	Time to result	Minimum quantity	all	none
		self	0.695804	0.681818	0.762238	0.671329	0.583916	0.667832	0.702797	0.527972	0.664336	0.608392	0.342657	0.384615	286
		delegation	0.659193	0.663677	0.717489	0.641256	0.515695	0.587444	0.627803	0.502242	0.650224	0.600897	0.331839	0.367713	223
		self or delegation	0.719512	0.72561	0.801829	0.679878	0.579268	0.661585	0.710366	0.588415	0.72561	0.670732	0.381098	0.39939	328
		Total	0.695341	0.694146	0.76583	0.666667	0.563919	0.643966	0.685783	0.544803	0.684588	0.630824	0.354839	0.385902	837
		Vets
		delegation_anforderung	info_h~l	~es_diag	info_h~t	info_h~n	i~mbezug	inf~tine	info_h~s	i~rbezug	info_h~r	info_~ge	info_~le	~f_keine	N
			Sampling Modality	Special diagnostics	Optimal transport	Time of analysis	Symptom-based request	Default analytics	Optimal container	Pathogen-based request	Time to result	Minimum quantity	all	none
		self	0.509615	0.509615	0.5	0.471154	0.528846	0.471154	0.442308	0.403846	0.519231	0.394231	0.192308	0.288461	104
		delegation	0.62	0.62	0.56	0.52	0.56	0.56	0.52	0.58	0.6	0.42	0.28	0.34	50
		self or delegation	0.445714	0.537143	0.428571	0.451429	0.525714	0.474286	0.371429	0.365714	0.6	0.382857	0.205714	0.337143	175
		Total	0.492401	0.541033	0.471125	0.468085	0.531915	0.486322	0.416413	0.410334	0.574468	0.392097	0.212766	0.322188	329
