# Supplementary material
Source: Research Square preprint supplement (doi:10.21203/rs.3.rs-6289246/v1)
Supplement: Supplementary file 2 [file a98b4291c3c682d77f9fdb9f.docx]

**Exploring challenges for infectious diseases diagnostics in human and veterinary**

**medicine in 2023 in German speaking countries: A One-Health approach to Diagnostic Stewardship**

Schwabe A1*, Siegel M2*, Abd El Wahed A3, Bischoff J4, Ceruti A3, Heenemann K5, Knaack D6, Kotsias-Konopelska S7, Pikalo J8, Schneitler V9, Toepfner N10, Wienemann T9, Joean O11*, Schneitler S12*

1 Institute for Hygiene and Public Health, University Hospital Bonn, Bonn, Germany

2 Department of Empirical Health Economics, Faculty VII - Economics and Management, Technische Universität Berlin, Berlin, Germany

3 Institute of Animal Hygiene and Veterinary Public Health, Faculty of Veterinary Medicine, Leipzig University Leipzig, An den Tierkliniken 1, 04103 Leipzig, Germany

4 Department of Internal Medicine I, University Hospital Bonn, Bonn, Germany

3 Institute of Animal Hygiene and Veterinary Public Health, Faculty of Veterinary Medicine, Leipzig University Leipzig, An den Tierkliniken 1, 04103 Leipzig, Germany

5 Institute of Virology, Faculty of Veterinary Medicine, University of Leipzig, An den Tierkliniken 29, 04103 Leipzig, Germany

6 Competence Center Microbiology and Hygiene, St. Franziskus-Hospital Muenster, Hohenzollernring 70, 48145 Muenster, Germany

7 Charité Universitätsmedizin Berlin, Institut für internationale Gesundheit, Charité Center for Global Health, Augustenburger Platz 1, 13353 Berlin, Germany

8 Institute of Parasitology, University of Veterinary Medicine Vienna, Veterinärplatz 1, 1210 Vienna, Austria

9 Institute of Medical Microbiology and Hospital Hygiene, Medical Faculty and University Hospital Düsseldorf, Heinrich-Heine-University Düsseldorf, Düsseldorf, Germany

10 Department of Pediatrics, Faculty of Medicine and University Hospital Carl Gustav Carus, Technische Universität Dresden, Dresden, Germany

11 Department of Respiratory Medicine and Infectious Diseases, Hannover Medical School, Hannover, Germany; Institute for Infectious Disease and Infection Control, Jena University Hospital, Friedrich-Schiller-University, Am Klinikum 1, 07749, Jena, Germany

12 Institute of Medical Microbiology and Hygiene, Saarland University, 66421, Homburg/Saar, Germany.

* Authors contributed equally

**Corresponding author:** Sophie Schneitler

| **Additional File 1.** List ofquestionnaire items (translated from German) | | | |
| --- | --- | --- | --- |
| **Topic** | **Question** | **Answer categories** | **Target groups** |
| Inter-professional cooperations | Whenever I order microbiological/virological diagnostics: | Single-choice:   - I always perform diagnostic-related tasks by myself - I always delegate diagnostic-related tasks to allied health-care workers - Sometimes I delegate and sometimes I perform the tasks personally | Physicians and veterinarians |
| Why do you perform diagnostic related tasks personally | Single-choice:   - formal requirement from employer - delegating is unreliable - other (free text box) | Physicians and veterinarians state that always perform diagnostic related tasks by themselves |
| Please provide more information | Open-end | Physicians and veterinarians who chose the ‘other’ answer above |
| Who fills in the clinical information regarding the patient whenever a diagnostic test is required? | Multiple-selection   - Nurses - Medical assistants - Physicians - Case-management personnel - Various professional groups - I don’t know - Nobody | HCWs in human medicine |
| Who fills in the clinical information regarding the patient whenever a diagnostic test is required? | Multiple selection   - Animal keepers - Veterinary assistants - Veterinarians - Students - Various professional groups - I don’t know - Nobody | HCWs in veterinary medicine |
| Knowledge level | How would you rate your knowledge level of infectious disease diagnostics? | Good/satisfactory/poor | All respondents |
| What type of urine sample would you send in a case of suspected urinary tract infection? | Multiple-selection   - Midstream urine sample - ‘in-and-out’ catheterisation - Indwelling catheter urine - First catch urine - 24-hour urine - The type of urine sample is irrelevant - This does not occur in my clinical practice | HCWs working in human medicine and caring for adults;  HCWs caring for both adults and children |
| What type of urine sample would you send in a case of suspected urinary tract infection in a baby or a toddler? | Multiple-selection   - First catch urine - ‘in-and-out’ catheterization - Indwelling catheter urine - Suprapubic aspirate - Urine sample from a bedpan - Urine collection bag - Midstream urine sample - The type of urine sample is irrelevant - This does not occur in my clinical practice | HCWs working in paediatrics;  HCWs caring for both adults and children |
| What type of urine sample would you send in a case of suspected urinary tract infection in an adolescent? | Multiple-selection   - Midstream urine sample - Any urine sample - First catch urine - 24-hour urine - Indwelling catheter urine - The type of urine sample is irrelevant - This does not occur in my clinical practice | HCWs working in paediatrics;  HCWs caring for adults, adolescents and children |
| What laboratory tests are usually performed if you send a midstream urine sample? | Single-choice:   - Urine pathogen culture and antibiotic susceptibility testing - Pathogens of sexually transmitted infections (*Gonococcus*, *Mycoplasma* spp., *Ureaplasma* spp.) identification and antibiotic susceptibility testing - Mycobacteria spp. culture - Urine pathogen PCR - All of the above - All of the above except for PCR - This does not occur in my clinical practice | HCWs in human medicine |
|  | What laboratory tests are usually performed if you send a first catch urine sample? | Single-choice:   - Urine pathogen culture and antibiotic susceptibility testing - Pathogens of sexually transmitted infections (*Gonococcus*, *Mycoplasma* spp., *Ureaplasma* spp.) identification and antibiotic susceptibility testing - *Mycobacteria* spp. culture - Urine pathogen PCR - All of the above - All of the above except for PCR - This does not occur in my clinical practice | HCWs in human medicine |
|  | What laboratory tests are usually performed if you send an indwelling catheter urine sample? | Single-choice:   - Urine pathogen culture and antibiotic susceptibility testing - Pathogens of sexually transmitted infections (*Gonococcus*, *Mycoplasma* spp., *Ureaplasma* spp.) identification and antibiotic susceptibility testing - *Mycobacteria* spp. culture - Urine pathogen PCR - All of the above - All of the above except for PCR - This does not occur in my clinical practice | HCWs in human medicine |
|  | How would you obtain a urine sample in case of suspected urinary tract infection in company animals? | Multiple-selection:   - Cystocentesis - Urethra catheterisation - Free catch | Veterinarians |
|  | Which of the following are common urinary pathogens? | Multiple-selection:   - *Leptospira* spp. - *E. coli* - Feline Morbilivirus - *Klebsiella* spp. - *Streptoccus* spp. - Pseudomonas spp | Veterinarians |
| Perceived need for improvement | What information is currently available to you when sending samples? | Multiple selection:   - Sampling modality - Default analytics - Optimal container - Optimal transport - Time of analysis - Time to result - Special diagnostics possible - Minimum sample volume - Costs - No information available | All respondents |
| Which of the information listed below would be helpful to you when requesting diagnostics? | Multiple selection:   - Sampling modality - Default analytics - Optimal container - Optimal transport - Time of analysis - Time to result - Special diagnostics possible - Minimum sample volume - Symptom-based request - Pathogen-based request - All of the above - No information necessary | All respondents |
| HCWs: healthcare workers; PCR: polymerase chain reaction | | | |
